# Supplementary material for: SAMHD1 silencing cooperates with radiotherapy to enhance anti-tumor immunity through IFI16-STING pathway in lung adenocarcinoma
Source: Springer Nature journal article supplement (doi:10.1186/s12967-022-03844-3), 2022-12-29
Supplement: MOESM1 [file 23865822]

## Additional Tables

**Table S1. Primer sequences used for amplification and the targeting siRNA sequences.**

| <b>Gene</b>    | <b>Sequence</b>          |
|----------------|--------------------------|
| GAPDH Fp       | ACAAC TTTGGTATCGTGGAAGG  |
| GAPDH Rp       | GCCATCACGCCACAGTTTC      |
| SAMHD1 Fp      | CCCAAAGTATTGCTAGACGTGA   |
| SAMHD1 Rp      | TGCATTCCATAATCCATGTTG    |
| MRE11 Fp       | ATCGGCCTGTCCAGTTTGAAA    |
| MRE11 Rp       | TGCCATCTTGATAGTTCACCCAT  |
| CtIP Fp        | AGCGTTTGTGGAGCCGTAT      |
| CtIP Rp        | GTTGGGTGGAATGTAGCG       |
| RAD50 Fp       | TAAGTGTGCAGAAATTGACCGAG  |
| RAD50 Rp       | GACGTACCTGCCGAAGTGTT     |
| NBS1 Fp        | AGGTGGGGAAGCTAGGTTGAT    |
| NBS1 Rp        | CACCGCCAATCCAATTTCTGC    |
| IFI16 Fp       | AGACTGAAGACTGAACCTGAAGA  |
| IFI16 Rp       | GAACCCATTGCGGCAAACATA    |
| STING Fp       | AGCATTACAACAACCTGCTACG   |
| STING Rp       | GTTGGGGTCAGCCATACTCAG    |
| IFN $\beta$ Fp | AACTTGCTTGGATTCCCTACAAAG |
| IFN $\beta$ Rp | TATTCAAGCCTCCCATTCAATTG  |
| CCL5 Fp        | CGCTGTCATCCTCATTGCTA     |
| CCL5 Rp        | CCAGACTTGCTGTCCCTCTC     |

---

|                |                        |
|----------------|------------------------|
| CXCL10 Fp      | CTGTACGCTGTACCTGCATCA  |
| CXCL10 Rp      | TTCTTGATGGCCTTCGATTC   |
| Actin Fp       | GGCTGTATTCCCCTCCATCG   |
| Actin RP       | CCAGTTGGTAACAATGCCATGT |
| Samhd1 Fp      | GAGAATCGTGGTTTCCGAGAG  |
| Samhd1 Rp      | CTCCAAGGAACTTACTCCCAGA |
| Ifn $\beta$ Fp | CAGCTCCAAGAAAGGACGAAC  |
| Ifn $\beta$ Rp | GGCAGTGTA ACTCTTCTGCAT |
| Ccl5 Fp        | GCTGCTTTGCCTACCTCTCC   |
| Ccl5 Rp        | TCGAGTGACAAACACGACTGC  |
| Cxcl10 Fp      | CCAAGTGCTGCCGTCATTTTC  |
| Cxcl10 Rp      | GGCTCGCAGGGATGATTTCAA  |
| Mhc-2 Fp       | TCAGTCGCAGACGGTGTTTAT  |
| Mhc-2 Rp       | GGGGGCTGGAATCTCAGGT    |
| Cd86 Fp        | TGTTTCCGTGGAGACGCAAG   |
| Cd86 Rp        | TTGAGCCTTTGTAAATGGGCA  |
| siSAMHD1-1     | CCUCGUCCGAAUCAUUGAUTT  |
| siSAMHD1-2     | GCGUAUUUGUGCUAGAGAUTT  |
| siSAMHD1-3     | GCAGAUGACUACAUAGAGATT  |
| shSamhd1       | GGATGAGGATCGTCTGGAA    |
| siSTING        | GGUCAUAUUACAUGGAUATT   |

---

**Table S2. Antibodies used in this study.**

| <b>Antibody</b>             | <b>Company</b>            | <b>Catalog number</b> |
|-----------------------------|---------------------------|-----------------------|
| GAPDH                       | Proteintech               | 10494-1-AP            |
| ssDNA                       | Sigma-Aldrich             | MAB3868               |
| IFI16                       | Abcam                     | Ab169788              |
| SAMHD1                      | Origene                   | TA502024              |
| STING                       | Proteintech               | 19851-1-AP            |
| IRF3                        | Proteintech               | 11312-1-AP            |
| p-IRF3                      | Cell Signaling Technology | 4947S                 |
| TBK1                        | Cell Signaling Technology | 3013S                 |
| p-TBK1                      | Cell Signaling Technology | 5483S                 |
| Dylight 549 Goat Anti-Mouse | Abbkkin                   | A23310                |
| FITC Goat Anti-Rabbit IgG   | Proteintech               | SA00003-2             |
| HRP Goat Anti-Rabbit IgG    | Proteintech               | SA00001-2             |
| HRP Goat Anti-Mouse IgG     | Proteintech               | SA00001-1             |
| Fixable Viability Stain 700 | BD Pharmingen             | 564997                |
| Ms CD45 PerCP-Cy5.5         | BD Pharmingen             | 550994                |
| Ms CD3 APC-Cy7              | BD Pharmingen             | 560590                |
| PE-Cy7 Anti-mouse CD4       | BD Pharmingen             | 552775                |
| Flour647 Anti-mouse CD8a    | BD Pharmingen             | 557682                |
| Ms CD86 PE-Cy7 GL1          | BD Pharmingen             | 560582                |
| CD11b APC-Cy7               | BD Pharmingen             | 557657                |
| Ms F4/80 BV421              | BD Pharmingen             | 565411                |
| Ms I-A/I-E BV480            | BD Pharmingen             | 746669                |

## Additional Figures

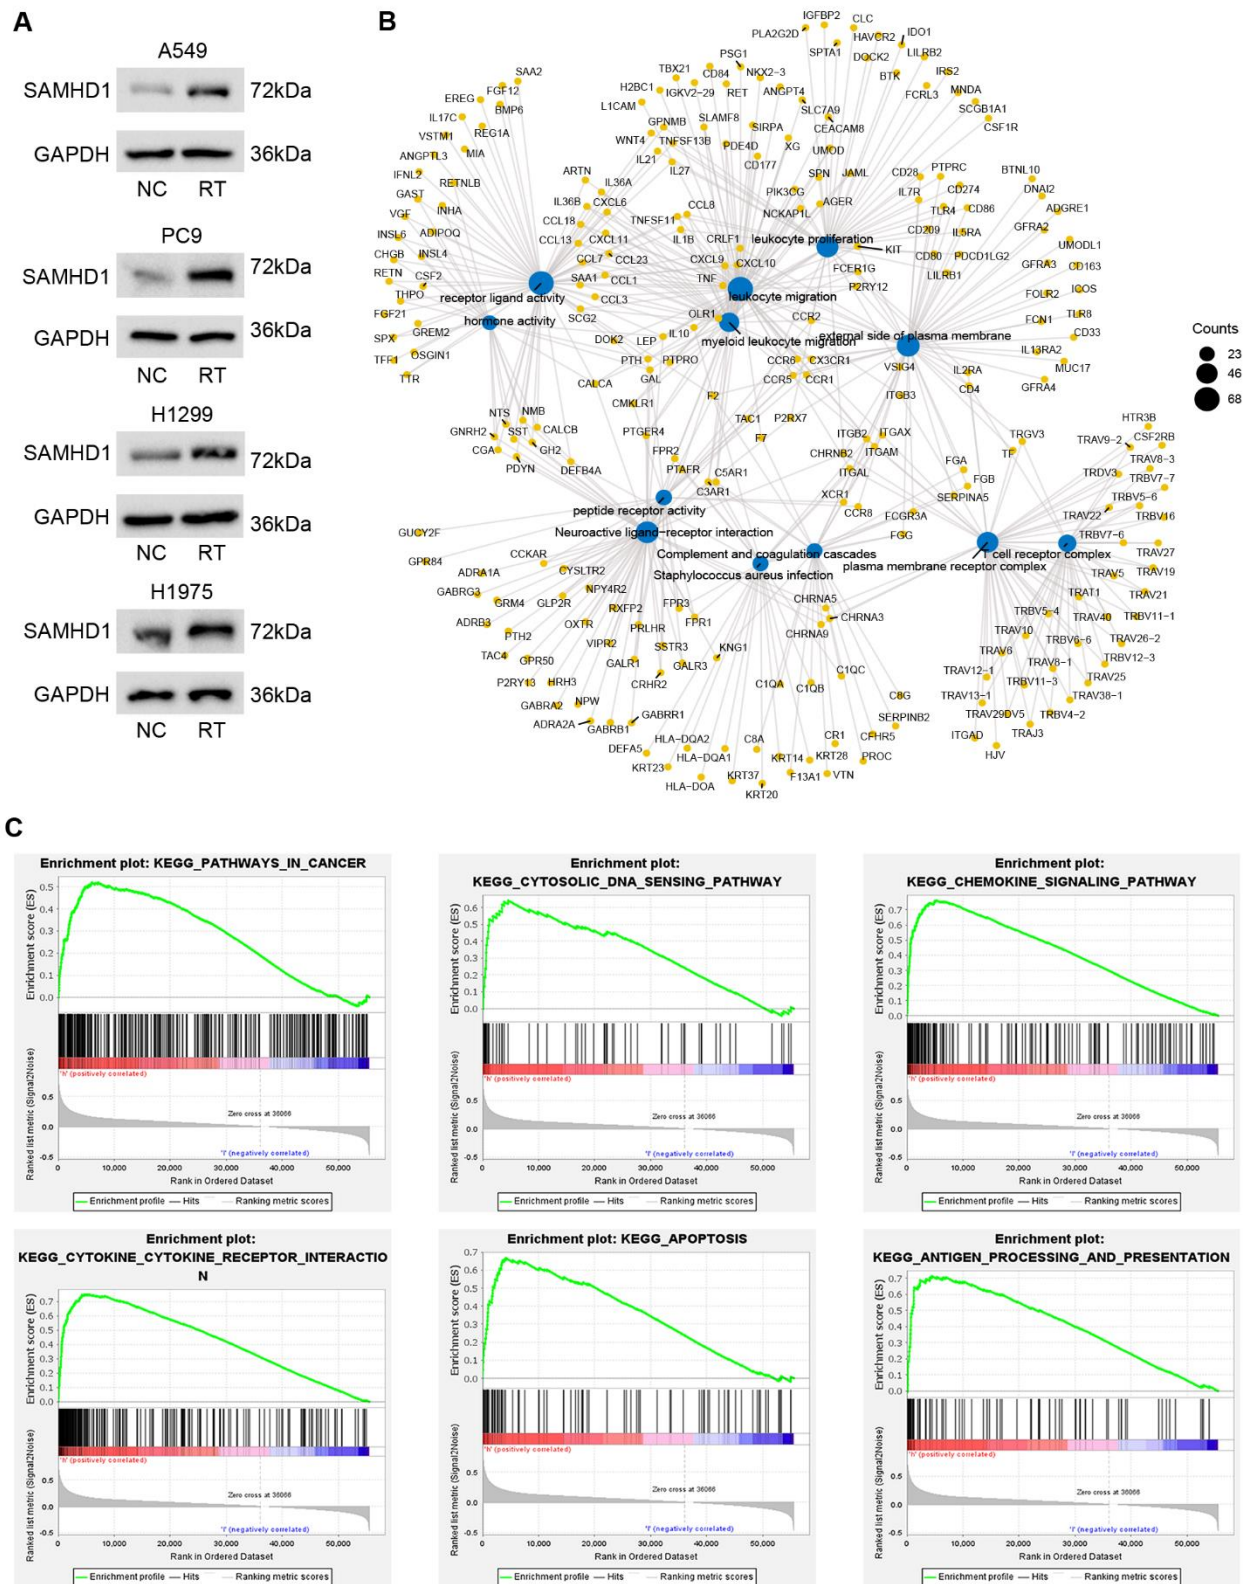

**Figure S1. Functional enrichment analysis to confirm the association of SAMHD1 with immunity. (A)**

The SAMHD1 protein levels after radiation were detected by immunoblotting in LUAD cell lines. **(B)** GO

and KEGG enrichment analysis. **(C)** GSEA analysis.

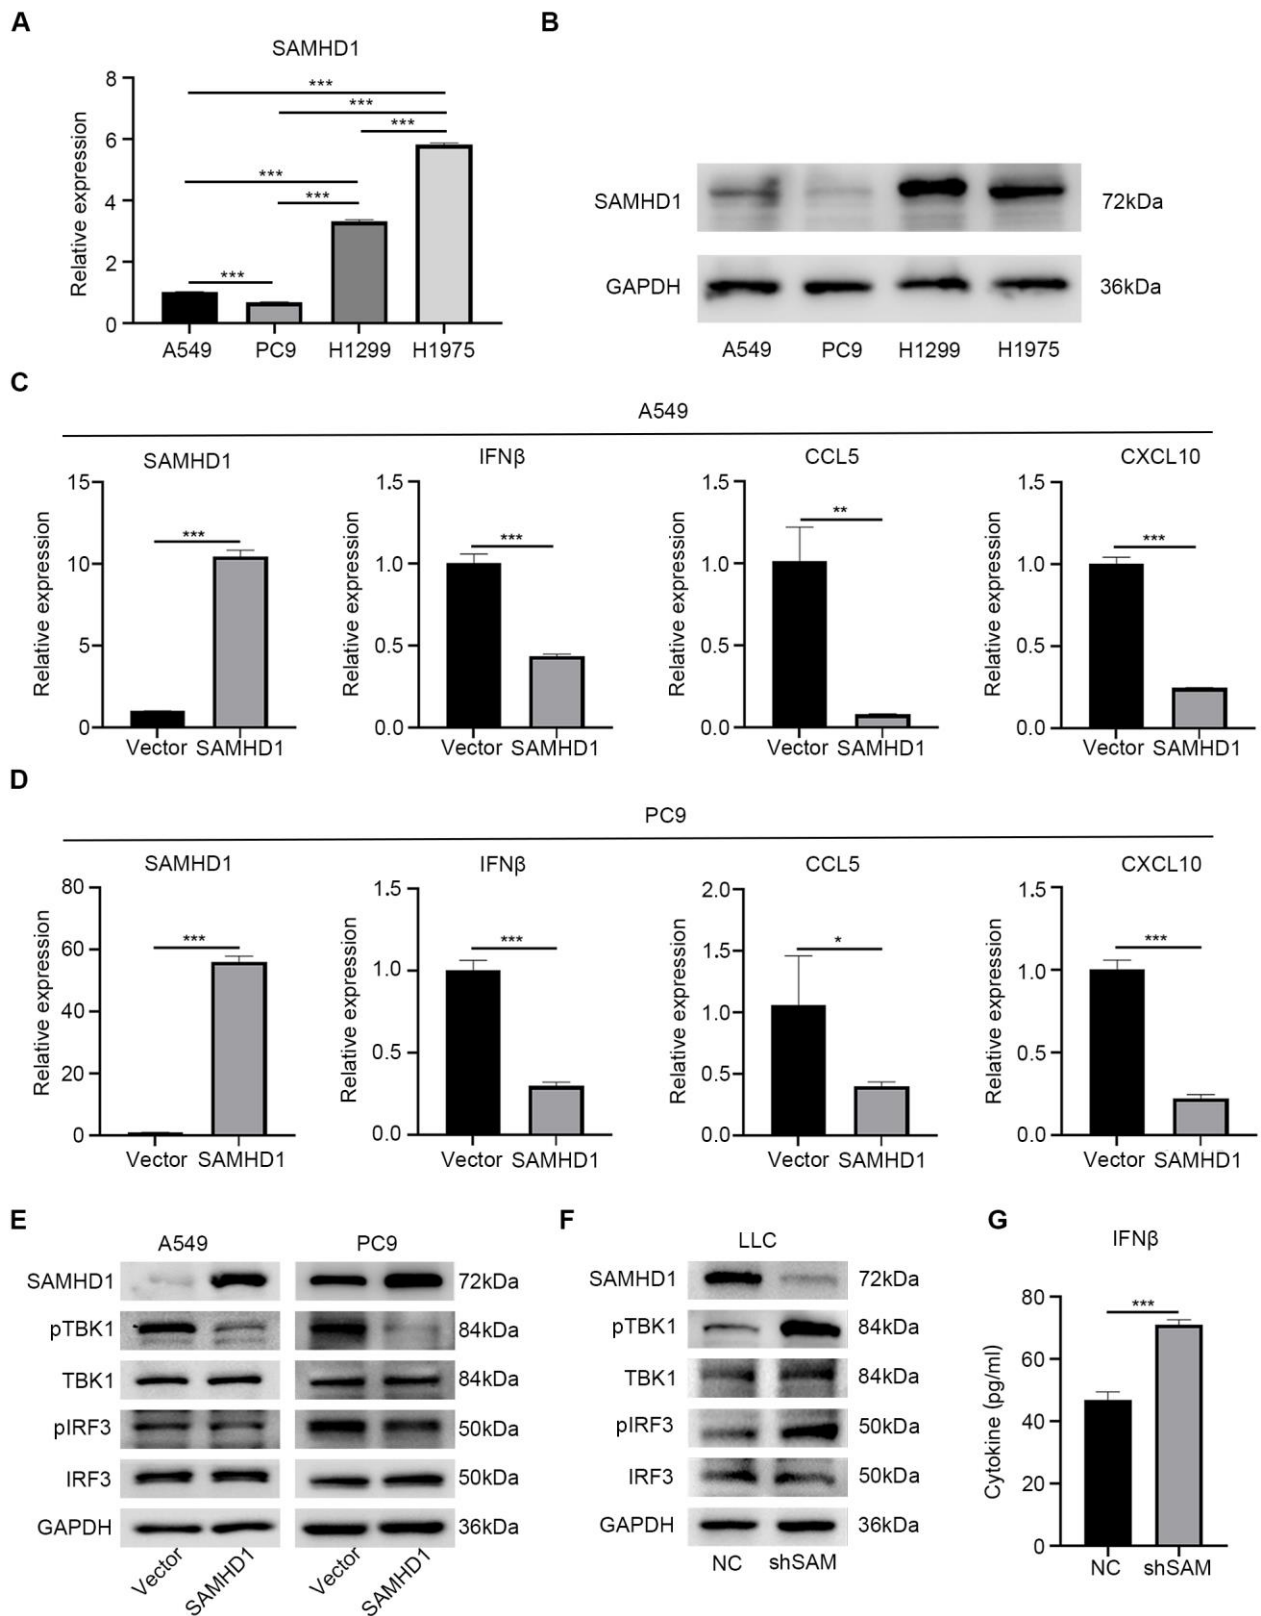

**Figure S2. SAMHD1 inhibited TBK1-IRF3-IFN-I pathway in LUAD cells.** (A, B) The mRNA and protein levels of SAMHD1 in LUAD cell lines. (C, D) The mRNA levels of IFN $\beta$ , CCL5 and CXCL10 in A549 and PC9 cells upon SAMHD1 overexpression were detected by qPCR. (E) The phosphorylation levels of TBK1 and IRF3 after SAMHD1 overexpression in A549 and PC9 cells were detected by immunoblotting. (F) TBK1-

IRF3 pathway protein levels in LLC cells were detected by immunoblotting. **(G)** Supernatant levels of IFN $\beta$  in LLC cells were detected by ELISA. N = 3; \*,  $P < 0.05$ ; \*\*,  $P < 0.01$ ; \*\*\*,  $P < 0.001$ .

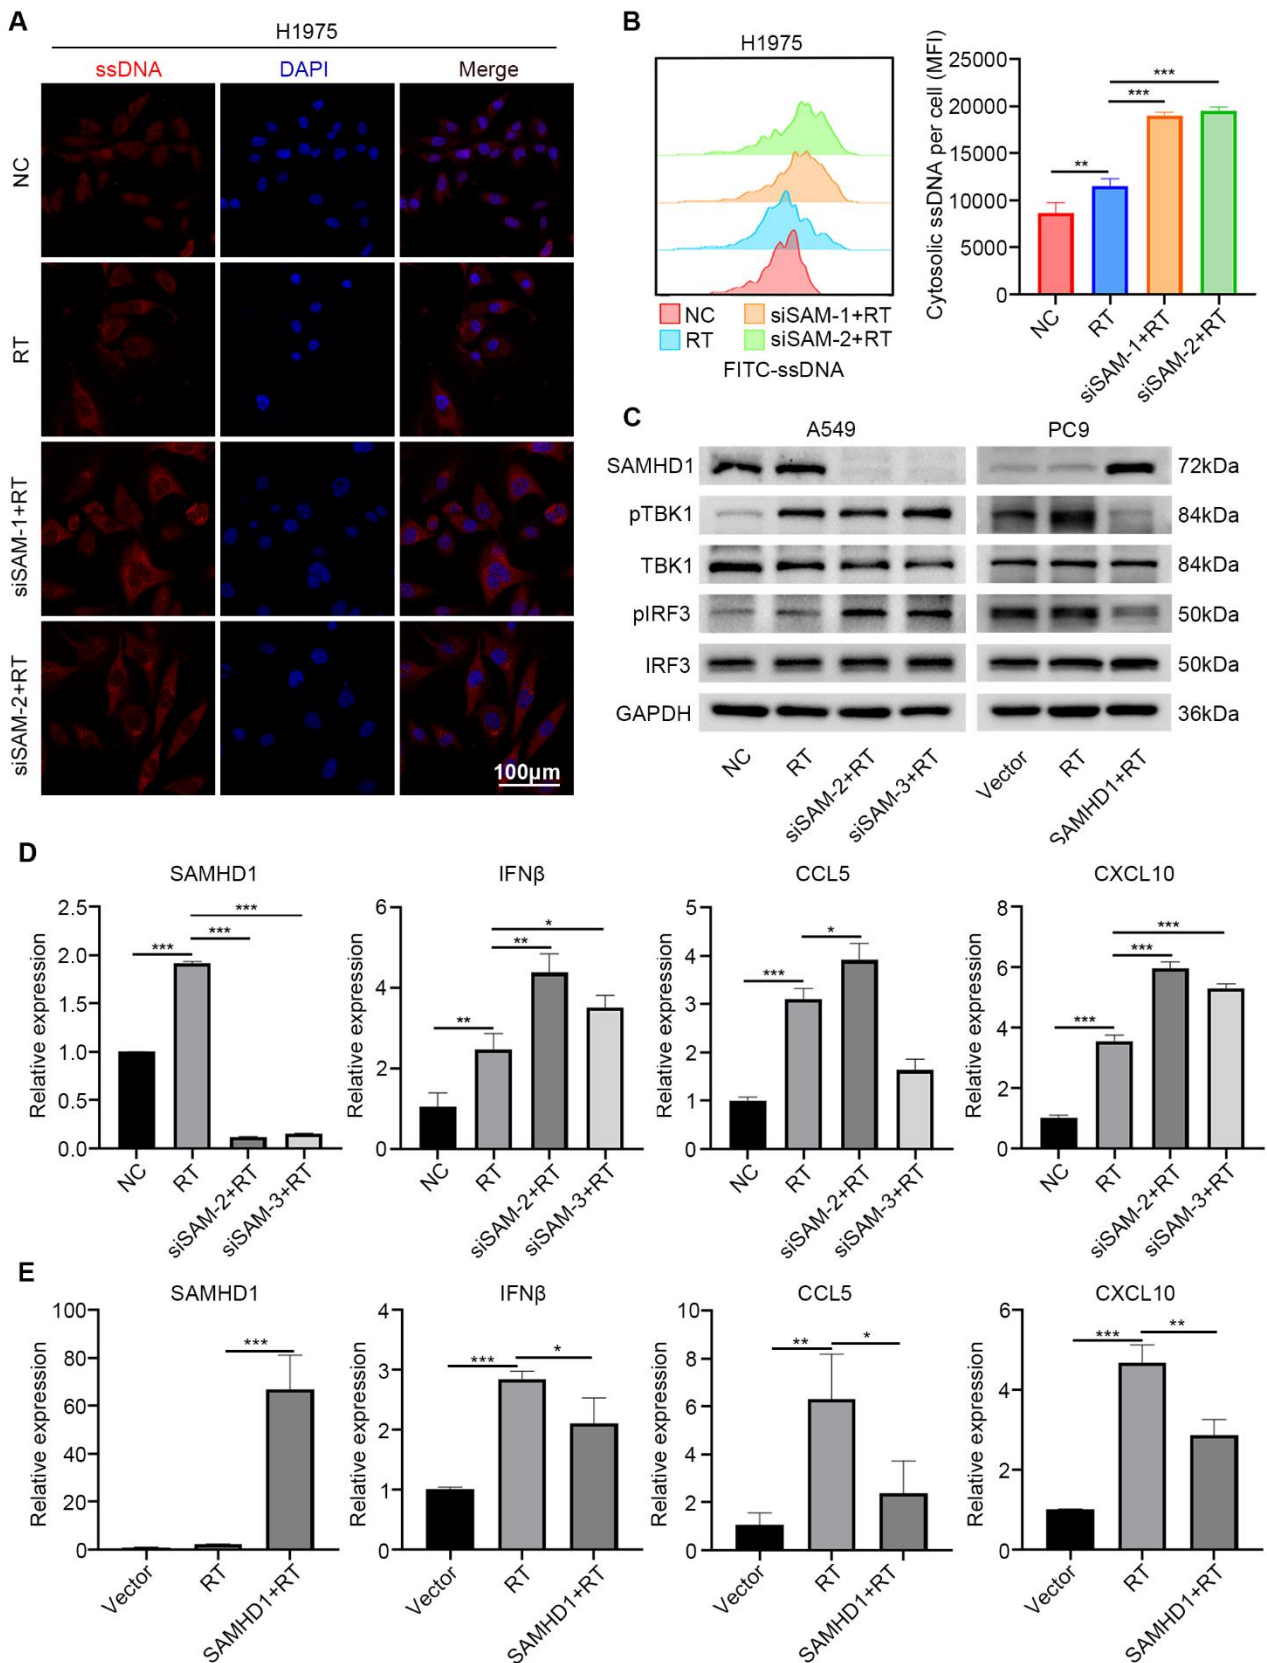

**Figure S3. SAMHD1 silencing synergized with radiotherapy to induce ssDNA accumulation and activate TBK1-IRF3-IFN-I signaling. (A)** Confocal images were performed to detect the accumulation of



ssDNA in cytoplasm in H1975 cells after radiation and transfecting siSAMHD1. **(B)** The accumulation of ssDNA in cytoplasm after radiation and siSAMHD1 transfection was detected by flow cytometry. The cytosolic ssDNA was evaluated by MFI. **(C)** TBK1-IRF3 pathway protein levels in A549 and PC9 cells after transfection and radiation were detected by immunoblotting. **(D)** The mRNA levels of SAMHD1, IFN $\beta$ , CCL5 and CXCL10 after SAMHD1 silencing and radiation in A549 cells were detected by qPCR. **(E)** The mRNA levels of SAMHD1, IFN $\beta$ , CCL5 and CXCL10 after SAMHD1 overexpression and radiation in PC9 cells were detected by qPCR. N = 3; \*,  $P < 0.05$ ; \*\*,  $P < 0.01$ ; \*\*\*,  $P < 0.001$ .

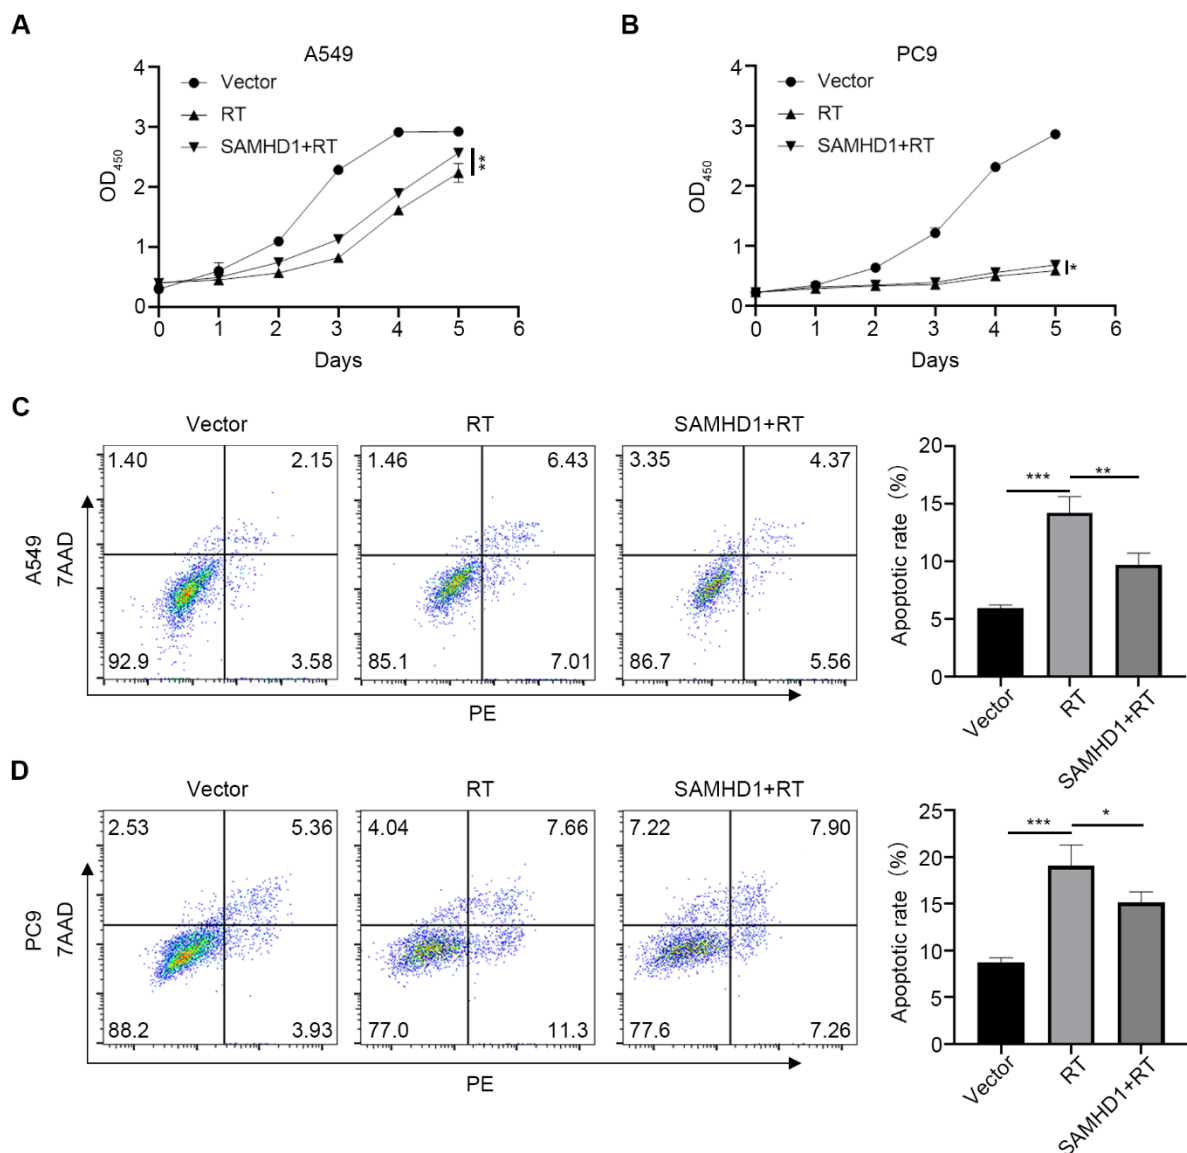

**Figure S4. SAMHD1 overexpression alleviated radiation-induced inhibition of LUAD cells growth. (A, B)** CCK8 assays were performed to evaluate the cell growth inhibition of SAMHD1 overexpression and radiation in A549 and PC9 cells. **(C, D)** The effects of SAMHD1 overexpression and radiation on apoptosis

were detected using flow cytometry. The statistical analyses on apoptotic rates.  $N = 3$ ; \*,  $P < 0.05$ ; \*\*,  $P < 0.01$ ; \*\*\*,  $P < 0.001$ .

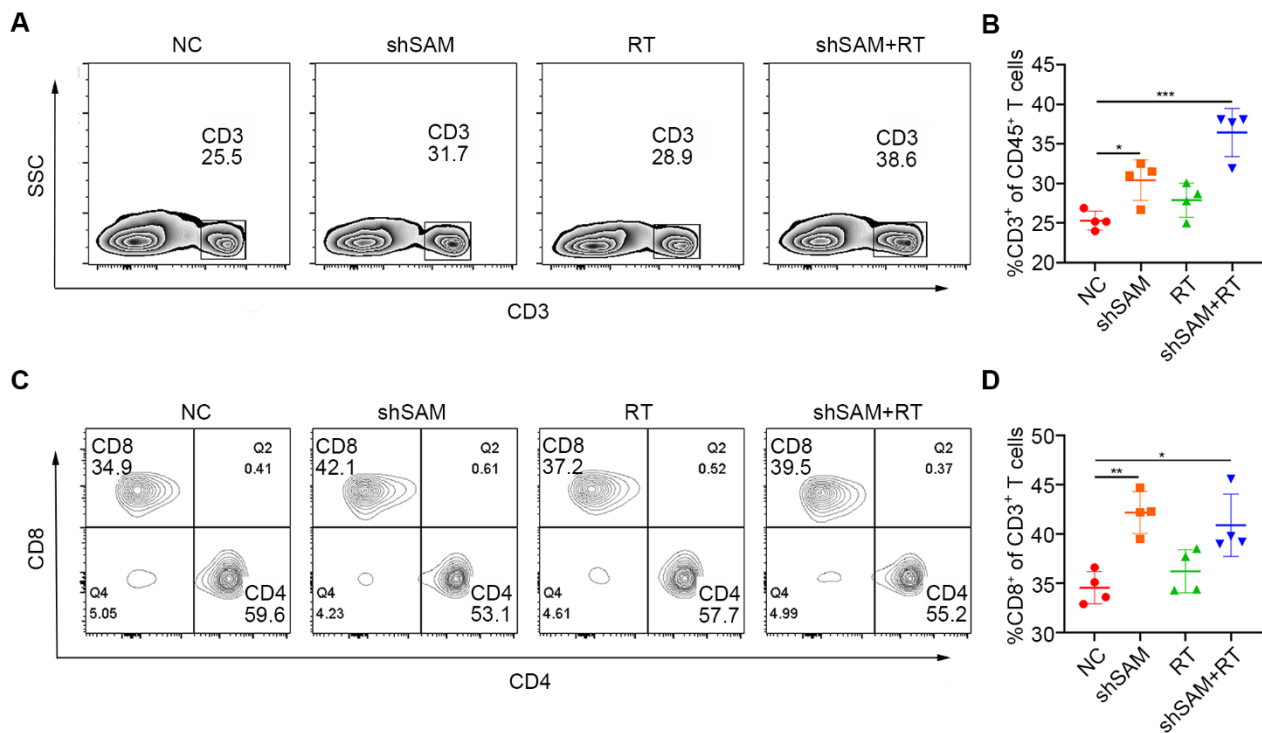

**Figure S5. SAMHD1 silencing synergized with radiotherapy to regulate CD3<sup>+</sup> and CD8<sup>+</sup> T cell infiltration in spleen.** (A) Representative flow cytometry of CD3<sup>+</sup> T cells in spleens. (B) Quantitative analysis of CD3<sup>+</sup> T cells in spleens. (C) Representative flow cytometry of CD4<sup>+</sup> T cells and CD8<sup>+</sup> T cells in spleens. (D) Quantitative analysis of CD8<sup>+</sup> T cells in spleens.  $N = 4$ ; \*,  $P < 0.05$ ; \*\*,  $P < 0.01$ ; \*\*\*,  $P < 0.001$ .
